# Supplementary material for: Clinically important changes and adverse events with centre-based or home-based pulmonary rehabilitation in chronic respiratory disease: A systematic review and meta-analysis
Source: PubMed Central journal article supplement — Chron Respir Dis. 2024 Aug 26;21:14799731241277808. doi: 10.1177/14799731241277808 (PMC11348370; doi:10.1177/14799731241277808), 2024-08-26
Supplement: sj-pdf-1-crd-10.1177_14799731241277808.pdf [file sj-pdf-1-crd-10.1177_14799731241277808.pdf]

**Table S1.** MEDLINE search strategy

1. Lung Diseases, Obstructive/
2. exp Pulmonary Disease, Chronic Obstructive/
3. emphysema\$.mp.
4. (chronic\$ adj3 bronchiti\$).mp.
5. (obstruct\$ adj3 (pulmonary or lung\$ or airway\$ or airflow\$ or bronch\$ or respirat\$)).mp.
6. COPD.mp.
7. COAD.mp.
8. COBD.mp.
9. AECB.mp.
10. AECOPD.mp.
11. exp chronic bronchitis/
12. or/1-11
13. exp Bronchiectasis/
14. bronchiect\$.mp.
15. bronchoect\$.mp.
16. kartagener\$.mp.
17. (ciliary adj3 dyskinesia).mp.
18. (bronchial\$ adj3 dilat\$).mp.
19. or/13-18
20. Lung Diseases, Interstitial/
21. Pulmonary Fibrosis/
22. Sarcoidosis, Pulmonary/
23. (interstitial\$ adj3 (lung\$ or disease\$ or pneumon\$)).mp.
24. ((pulmonary\$ or lung\$ or alveoli\$) adj3 (fibros\$ or fibrot\$)).mp.
25. ((pulmonary\$ or lung\$) adj3 (sarcoid\$ or granulom\$)).mp.
26. or/20-25
27. 12 or 19 or 26
28. Rehabilitation/
29. Exercise Movement Techniques/ or Exercise Therapy/
30. (rehabilitat\$ or fitness or exercis\$ or train\$).mp.
31. 28 or 29 or 30
32. randomized controlled trial.pt.
33. controlled clinical trial.pt.
34. randomized.ab.
35. randomised.ab.
36. Randomized Controlled Trials as Topic/
37. randomly.ab.
38. trial.ti.
39. 32 or 33 or 34 or 35 or 36 or 37 or 38
40. exp animals/ not humans.sh.
41. 39 not 40
42. 27 and 31 and 41
43. limit 42 to yr="2014 -Current"

**Table S2.** EMBASE search strategy

1. chronic obstructive lung disease/
2. emphysema\$.mp.
3. (chronic\$ adj3 bronchiti\$).mp.
4. (obstruct\$ adj3 (pulmonary or lung\$ or airway\$ or airflow\$ or bronch\$ or respirat\$)).mp.
5. COPD.mp.
6. COAD.mp.
7. COBD.mp.
8. AECB.mp.
9. AECOPD.mp.
10. exp chronic bronchitis/
11. or/1-10
12. exp Bronchiectasis/
13. bronchiect\$.mp.
14. bronchoect\$.mp.
15. kartagener\$.mp.
16. (ciliary adj3 dyskinesia).mp.
17. (bronchial\$ adj3 dilat\$).mp.
18. or/12-17
19. interstitial lung disease/
20. lung fibrosis/
21. lung sarcoidosis/
22. (interstitial\$ adj3 (lung\$ or disease\$ or pneumon\$)).mp.
23. ((pulmonary\$ or lung\$ or alveoli\$) adj3 (fibros\$ or fibrot\$)).mp.
24. ((pulmonary\$ or lung\$) adj3 (sarcoid\$ or granulom\$)).mp.
25. or/20-24
26. 11 or 18 or 25
27. Rehabilitation/
28. kinesiotherapy/
29. (rehabilitat\$ or fitness or exercis\$ or train\$).mp.
30. 27 or 28 or 29
31. randomized controlled trial.pt.
32. controlled clinical trial.pt.
33. randomized.ab.
34. randomised.ab.
35. Randomized Controlled Trials as Topic/
36. randomly.ab.
37. trial.ti.
38. 31 or 32 or 33 or 34 or 35 or 36 or 37
39. exp animal/ not human.sh.
40. 38 not 39
41. 26 and 30 and 40
42. limit 41 to yr="2014 -Current"

**Table S3.** CINAHL search strategy

|                                                                                          |
|------------------------------------------------------------------------------------------|
| 1. (MH "Lung Diseases, Obstructive")                                                     |
| 2. (MH "Pulmonary Disease, Chronic Obstructive+")                                        |
| 3. TX emphysema*                                                                         |
| 4. TX chronic* N3 bronchit*                                                              |
| 5. TX (obstruct* N3 (pulmonary or lung* or airway* or airflow* or bronch* or respirat*)) |
| 6. TX COPD                                                                               |
| 7. TX COAD                                                                               |
| 8. TX COBD                                                                               |
| 9. TX AECB                                                                               |
| 10. TX AECOPD                                                                            |
| 11. (MH "Bronchitis, Chronic")                                                           |
| 12. or/1-11                                                                              |
| 13. (MH "Bronchiectasis")                                                                |
| 14. TX bronchiect*                                                                       |
| 15. TX Bronchoect*.                                                                      |
| 16. TX Kartagener*                                                                       |
| 17. TX (ciliary N3 dyskinesia)                                                           |
| 18. TX (bronchial* N3 dilat*)                                                            |
| 19. or/13-18                                                                             |
| 20. (MH "Lung Diseases, Interstitial")                                                   |
| 21. (MH "Pulmonary Fibrosis")                                                            |
| 22. TX (interstitial* N3 (lung* or disease* or pneumon*))                                |
| 23. TX ((pulmonary* or lung* or alveoli*) N3 (fibros* or fibrot*))                       |
| 24. TX ((pulmonary* or lung*) N3 (sarcoid* or granulom*))                                |
| 25. or/20-24                                                                             |
| 26. 12 or 19 or 25                                                                       |
| 27. (MH "Rehabilitation")                                                                |
| 28. (MH "Therapeutic Exercise")                                                          |
| 29. TX rehabilitat* or fitness or exercis* or train*                                     |
| 30. 27 or 28 or 29                                                                       |
| 31. (MH "Randomized Controlled Trials")                                                  |
| 32. randomized.ab.                                                                       |
| 33. randomised.ab.                                                                       |
| 34. randomly.ab.                                                                         |
| 35. trial.ti.                                                                            |
| 36. 31 or 32 or 33 or 34 or 35                                                           |
| 37. (MH "Animals+")                                                                      |
| 38. 36 not 37                                                                            |
| 39. 26 and 30 and 38 (Published Date: 20140301-)                                         |

**Table S4.** CENTRAL search strategy

|                                                                                       |
|---------------------------------------------------------------------------------------|
| 1. MESH DESCRIPTOR Lung Diseases, Obstructive                                         |
| 2. MESH DESCRIPTOR Pulmonary Disease, Chronic Obstructive EXPLODE ALL TREES           |
| 3. emphysema*                                                                         |
| 4. chronic* ADJ3 bronchiti*                                                           |
| 5. obstruct* ADJ3 (pulmonary OR lung* OR airway* OR airflow* OR bronch* OR respirat*) |
| 6. COPD                                                                               |
| 7. COAD                                                                               |
| 8. COBD                                                                               |
| 9. AECB                                                                               |
| 10. AECOPD                                                                            |
| 11. MESH DESCRIPTOR Bronchitis, Chronic EXPLODE ALL TREES                             |

12. 1 OR 2 OR 3 OR 4 OR 5 OR 6 OR 7 OR 8 OR 9 OR 10 OR 11  
 13. MESH DESCRIPTOR Bronchiectasis EXPLODE ALL TREES  
 14. bronchiect\*  
 15. Bronchoect\*  
 16. Kartagener\*  
 17. ciliary ADJ3 dyskinesia  
 18. bronchial\* ADJ3 dilat\*  
 19. 13 OR 14 OR 15 OR 16 OR 17 OR 18  
 20. MESH DESCRIPTOR Lung Diseases, Interstitial  
 21. MESH DESCRIPTOR Pulmonary Fibrosis  
 22. MESH DESCRIPTOR Sarcoidosis, Pulmonary  
 23. interstitial\* ADJ3 (lung\* OR disease\* OR pneumon\*  
 24. ((pulmonary\* OR lung\* OR alveoli\*) ADJ3 (fibros\* OR fibrot\*))  
 25. (pulmonary\* OR lung\* OR alveoli\*) ADJ3 (fibros\* OR fibrot\*)  
 26. 20 OR 21 OR 22 OR 23 OR 24 OR 25  
 27. 12 OR 19 OR 26  
 28. MESH DESCRIPTOR Rehabilitation  
 29. (MESH DESCRIPTOR Exercise Therapy  
 30. MESH DESCRIPTOR Exercise Movement Techniques  
 31. rehabilitat\* OR fitness\* OR exercis\* or train\*  
 32. #28 OR #29 OR #30 OR #31  
 33. MESH DESCRIPTOR Randomized Controlled Trials as Topic EXPLODE ALL TREES  
 34. Randomized:AB  
 35. Randomised:AB  
 36. Randomly:AB  
 37. Trial:TI  
 38. #33 OR #34 OR #35 OR #36 OR #37  
 39. MESH DESCRIPTOR Animals EXPLODE ALL TREES  
 40. 38 NOT 39  
 41. 27 AND 32 AND 40  
 42. 01/03/2014 TO DATE OF SEARCH:CD  
 43. 41 AND 42

**Table S5.** PEDro search strategy

|                                                                                                                                                                           |
|---------------------------------------------------------------------------------------------------------------------------------------------------------------------------|
| <p>1. Abstract/Title: rehabilitat*</p> <p>Topic: chronic respiratory disease<br/>           Method: clinical trial<br/>           New records added since: 01/03/2014</p> |
| <p>2. Abstract/Title: fitness</p> <p>Topic: chronic respiratory disease<br/>           Method: clinical trial<br/>           New records added since: 01/03/2014</p>      |
| <p>3. Abstract/Title: exercis*</p> <p>Topic: chronic respiratory disease<br/>           Method: clinical trial<br/>           New records added since: 01/03/2014</p>     |
| <p>4. Abstract/Title: train*</p> <p>Topic: chronic respiratory disease<br/>           Method: clinical trial<br/>           New records added since: 01/03/2014</p>       |

**Table S6.** Comparisons within included studies

| Study                     | Diagnosis      | Comparison              | MCID of outcomes |
|---------------------------|----------------|-------------------------|------------------|
| Baumann 2012              | COPD           | Centre PR vs Usual Care | No               |
| Benzo 2016                | COPD           | Home PR vs Usual Care   | Yes              |
| Benzo 2021                | COPD           | Home PR vs Usual Care   | No               |
| Benzo 2022                | COPD           | Home PR vs Usual Care   | Yes              |
| Bernocchi 2016            | COPD           | Centre PR vs Usual Care | No               |
| Bourne 2017               | COPD           | Home PR vs Centre PR    | No               |
| Bourne 2022               | COPD           | Home PR vs Usual Care   | No               |
| Casaburi 2004             | COPD           | Centre PR vs Usual Care | No               |
| Casey 2013                | COPD           | Centre PR vs Usual Care | No               |
| Cedeno de Jesus 2022      | Bronchiectasis | Centre PR vs Usual Care | Yes              |
| Cerdan-de-las-Heras 2021  | ILD            | Home PR vs Usual Care   | No               |
| Cerdan-de-las-Heras 2022  | COPD           | Home PR vs Centre PR    | No               |
| Cerdan-de-las-Heras 2022  | ILD            | Home PR vs Centre PR    | No               |
| Chen 2018                 | COPD           | Home PR vs Usual Care   | No               |
| Cox 2022                  | Mixed          | Home PR vs Centre PR    | Yes              |
| Dale 2014                 | ILD            | Centre PR vs Usual Care | No               |
| Deepak 2014               | AECOPD         | Centre PR vs Usual Care | Yes              |
| Dowman 2017               | ILD            | Centre PR vs Usual Care | Yes              |
| Eaton 2009                | AECOPD         | Centre PR vs Usual Care | No               |
| Ercin 2020                | COPD           | Home PR vs Centre PR    | No               |
| Faulkner 2010             | COPD           | Centre PR vs Usual Care | No               |
| Gottlieb 2011             | COPD           | Centre PR vs Usual Care | Yes              |
| Hansen 2020/2023          | COPD           | Home PR vs Centre PR    | Yes              |
| Hoff 2007                 | COPD           | Centre PR vs Usual Care | No               |
| Holland 2008              | ILD            | Centre PR vs Usual Care | No               |
| Holland 2017              | COPD           | Home PR vs Centre PR    | Yes              |
| Horton 2018               | COPD           | Home PR vs Centre PR    | Yes              |
| Johnson-Warrington 2016   | AECOPD         | Home PR vs Usual Care   | Yes              |
| Jose 2021                 | Bronchiectasis | Home PR vs Usual Care   | No               |
| Kataoka 2023              | ILD            | Centre vs Usual Care    | No               |
| Ku 2017                   | ILD            | Centre PR vs Usual Care | No               |
| Lahham 2020               | COPD           | Home PR vs Usual Care   | Yes              |
| Lee 2022                  | COPD           | Centre PR vs Usual Care | No               |
| Maglakelidze 2022         | COPD           | Centre vs Usual Care    | No               |
| Majewska-Pulsakowska 2016 | COPD           | Centre PR vs Usual Care | No               |
| Maltais 2008              | COPD           | Home PR vs Centre PR    | No               |
| Man 2004                  | AECOPD         | Centre PR vs Usual Care | No               |
| Mitchell 2014             | COPD           | Home PR vs Usual Care   | Yes              |
| Naz 2018                  | ILD            | Centre PR vs Usual Care | No               |
| Nyberg 2014               | COPD           | Centre PR vs Usual Care | No               |
| O'Shea 2007               | COPD           | Centre PR vs Usual Care | No               |
| Perez-Bogerd 2018         | ILD            | Centre PR vs Usual Care | Yes              |
| Tsai 2017                 | COPD           | Home PR vs Usual Care   | No               |
| Vainshelboim 2014         | ILD            | Centre PR vs Usual Care | No               |
| Vasilopoulou 2017         | COPD           | Centre PR vs Usual Care | Yes              |
| Wallaert 2020             | ILD            | Centre PR vs Usual Care | No               |
| Widyastuti 2018           | COPD           | Home PR vs Centre PR    | Yes              |
| Wootton 2014              | COPD           | Centre PR vs Usual Care | No               |
| Zanaboni 2023             | COPD           | Home PR vs Usual Care   | No               |

**Table S7.** Included studies reporting adverse event data

| Study          | Diagnosis | Comparison              | Adverse event reporting            | Intervention related adverse events |
|----------------|-----------|-------------------------|------------------------------------|-------------------------------------|
| Baumann 2012   | COPD      | Centre PR vs Usual Care | Rehabilitation group only          | 0 events                            |
| Benzo 2021     | COPD      | Home PR vs Usual Care   | Group level (data for both groups) | 0 events                            |
| Benzo 2022     | COPD      | Home PR vs Usual Care   | Rehabilitation group only          | 0 events                            |
| Bernocchi 2018 | COPD      | Centre PR vs Usual Care | Rehabilitation group only          | 0 events                            |
| Bourne 2017    | COPD      | Home PR vs Centre       | Group level (data for both         | 3 events in centre (back pain,      |

|                           |                |                         |                                             |                                                                                                                                                                                                                                                                                                                                        |
|---------------------------|----------------|-------------------------|---------------------------------------------|----------------------------------------------------------------------------------------------------------------------------------------------------------------------------------------------------------------------------------------------------------------------------------------------------------------------------------------|
|                           |                | PR                      | groups)                                     | inguinal pain, common cold), 2 events in home (back pain, musculoskeletal chest pain)                                                                                                                                                                                                                                                  |
| Bourne 2022               | COPD           | Home PR vs Usual Care   | Group level (data for both groups)          | 0 events                                                                                                                                                                                                                                                                                                                               |
| Casaburi 2004             | COPD           | Centre PR vs Usual Care | Rehabilitation group only                   | 0 events                                                                                                                                                                                                                                                                                                                               |
| Casey 2013                | COPD           | Centre PR vs Usual Care | Study level (combined data for both groups) | 1 event (shortness of breath) to baseline ISWT testing, 1 upon arrival at intervention session (chest pain)                                                                                                                                                                                                                            |
| Cedeno de Jesus 2022      | Bronchiectasis | Centre PR vs Usual Care | Rehabilitation group only                   | 0 events                                                                                                                                                                                                                                                                                                                               |
| Cerdan-de-las-Heras 2021  | ILD            | Home PR vs Usual Care   | Study level (combined data for both groups) | 0 events                                                                                                                                                                                                                                                                                                                               |
| Cerdan-de-las-Heras 2022  | COPD           | Home PR vs Centre PR    | Home rehabilitation group only              | 0 events                                                                                                                                                                                                                                                                                                                               |
| Cerdan-de-las-Heras 2022  | ILD            | Home PR vs Usual Care   | Home rehabilitation group only              | 0 events                                                                                                                                                                                                                                                                                                                               |
| Chen 2018                 | COPD           | Home PR vs Usual Care   | Study level (combined data for both groups) | 0 events during intervention, 1 event (sore lower limb) following strength testing                                                                                                                                                                                                                                                     |
| Cox 2021                  | Mixed          | Home PR vs Centre PR    | Group level (data for both groups)          | 0 events                                                                                                                                                                                                                                                                                                                               |
| Dale 2014                 | ILD            | Centre PR vs Usual Care | Rehabilitation group only                   | 0 events                                                                                                                                                                                                                                                                                                                               |
| Dowman 2017               | ILD            | Centre PR vs Usual Care | Rehabilitation group only                   | 0 events                                                                                                                                                                                                                                                                                                                               |
| Eaton 2009                | AECOPD         | Centre PR vs Usual Care | Rehabilitation group only                   | 0 events                                                                                                                                                                                                                                                                                                                               |
| Ercin 2020                | COPD           | Home PR vs Centre PR    | Study level (combined data for both groups) | 0 events                                                                                                                                                                                                                                                                                                                               |
| Faulkner 2010             | COPD           | Centre PR vs Usual Care | Study level (combined data for both groups) | 0 events                                                                                                                                                                                                                                                                                                                               |
| Hansen 2020/Hansen 2023   | COPD           | Home PR vs Centre PR    | Group level (data for both groups)          | 2 events with centre PR related to overload with subsequent pain in the knee and groin (did not require medical treatment).                                                                                                                                                                                                            |
| Hoff 2007                 | COPD           | Centre PR vs Usual Care | Study level (combined data for both groups) | 0 events                                                                                                                                                                                                                                                                                                                               |
| Holland 2008              | ILD            | Centre PR vs Usual Care | Rehabilitation group only                   | 0 events                                                                                                                                                                                                                                                                                                                               |
| Holland 2017              | COPD           | Home PR vs Centre PR    | Group level (data for both groups)          | 0 events                                                                                                                                                                                                                                                                                                                               |
| Horton 2018               | COPD           | Home PR vs Centre PR    | Group level (data for both groups)          | 0 events                                                                                                                                                                                                                                                                                                                               |
| Johnson-Warrington 2016   | AECOPD         | Home PR vs Usual Care   | Study level (combined data for both groups) | 0 serious events                                                                                                                                                                                                                                                                                                                       |
| Jose 2021                 | Bronchiectasis | Home PR vs Usual Care   | Rehabilitation group only                   | 0 events                                                                                                                                                                                                                                                                                                                               |
| Kataoka 2023              | ILD            | Centre PR vs Usual Care | Group level (data for both groups)          | 0 events                                                                                                                                                                                                                                                                                                                               |
| Ku 2017                   | ILD            | Centre PR vs Usual Care | Study level (combined data for both groups) | 0 events                                                                                                                                                                                                                                                                                                                               |
| Lee 2022                  | COPD           | Centre PR vs Usual Care | Study level (combined data for both groups) | 0 events                                                                                                                                                                                                                                                                                                                               |
| Maglakelidze 2022         | COPD           | Centre PR vs Usual care | Study level (combined data for both groups) | 0 events                                                                                                                                                                                                                                                                                                                               |
| Majewska-Pulsakowska 2016 | COPD           | Centre PR vs Usual Care | Group level (data for both groups)          | 0 events                                                                                                                                                                                                                                                                                                                               |
| Maltais 2008              | COPD           | Home PR vs Centre PR    | Group level (data for both groups)          | 0 serious events                                                                                                                                                                                                                                                                                                                       |
| Man 2004                  | AECOPD         | Centre PR vs Usual Care | Rehabilitation group only                   | 0 events                                                                                                                                                                                                                                                                                                                               |
| Naz 2018                  | ILD            | Centre PR vs Usual Care | Rehabilitation group only                   | 0 events                                                                                                                                                                                                                                                                                                                               |
| Nyberg 2014               | COPD           | Centre PR vs Usual Care | Group level (data for both groups)          | 8 participants reported a total number of 28 adverse events distributed over 18 (3.6%) of the attended exercise sessions. All adverse events were minor and temporary. The adverse events were musculoskeletal (such as pain or soreness: 64%), related to the elastic resistance bands (such as bruising, pain, laceration, swelling: |

|                   |      |                                  |                                             |                                                                                                                                                            |
|-------------------|------|----------------------------------|---------------------------------------------|------------------------------------------------------------------------------------------------------------------------------------------------------------|
|                   |      |                                  |                                             | 32%), and dizziness (4%). Seven out of the nine (78%) adverse events related to the elastic resistance bands was reported during the first seven sessions. |
| O'Shea 2007       | COPD | Centre PR vs Usual Care          | Rehabilitation group only                   | 2 events (acute low back pain, and one mild adductor strain) which resolved after a week's rest                                                            |
| Perez-Bogerd 2018 | ILD  | Centre PR vs Usual Care          | Rehabilitation group only                   | 0 events                                                                                                                                                   |
| Tsai 2017         | COPD | Home PR vs Usual Care            | Rehabilitation group only                   | 0 events                                                                                                                                                   |
| Vainshelboim 2014 | ILD  | Centre PR vs Usual Care          | Rehabilitation group only                   | 0 serious events                                                                                                                                           |
| Wallaert 2020     | ILD  | Centre PR vs Usual Care          | Study level (combined data for both groups) | 0 serious events                                                                                                                                           |
| Wootton 2014      | COPD | Centre PR vs Usual Care          | Rehabilitation group only                   | 0 events                                                                                                                                                   |
| Zanaboni 2023     | COPD | Home PR vs Home PR vs Usual Care | Group level (data for all groups)           | 0 events                                                                                                                                                   |

**Table S8. Summary of findings: Pulmonary Rehabilitation compared to usual care for COPD**

### Pulmonary Rehabilitation compared to Usual care for COPD

**Patient or population:** COPD

**Setting:**

**Intervention:** Pulmonary Rehabilitation

**Comparison:** Usual care

| Outcomes                 | Anticipated absolute effects* (95% CI) |                                       | Relative effect (95% CI)          | No of participants (studies) | Certainty of the evidence (GRADE) | Comments                                                                                                                     |
|--------------------------|----------------------------------------|---------------------------------------|-----------------------------------|------------------------------|-----------------------------------|------------------------------------------------------------------------------------------------------------------------------|
|                          | Risk with Usual care                   | Risk with Pulmonary Rehabilitation    |                                   |                              |                                   |                                                                                                                              |
| Exercise capacity (6MWT) | 101 per 1,000                          | <b>557 per 1,000</b><br>(70 to 1,000) | <b>RR 5.51</b><br>(0.69 to 44.06) | 247<br>(3 RCTs)              | ⊕⊕○○<br>Low <sup>a</sup>          | Pulmonary Rehabilitation may result in a large increase in the number of people achieving MCID for exercise capacity (6MWT). |
| Exercise capacity (ISWT) | 164 per 1,000                          | <b>245 per 1,000</b><br>(151 to 401)  | <b>RR 1.50</b><br>(0.92 to 2.45)  | 227<br>(2 RCTs)              | ⊕⊕○○<br>Low <sup>b</sup>          | Pulmonary Rehabilitation may result in an increase in the number of people achieving a MCID in exercise capacity (ISWT).     |

## Pulmonary Rehabilitation compared to Usual care for COPD

Patient or population: COPD

Setting:

Intervention: Pulmonary Rehabilitation

Comparison: Usual care

| Outcomes                       | Anticipated absolute effects*<br>(95% CI) |                                          | Relative effect<br>(95% CI)      | No of participants<br>(studies) | Certainty of the<br>evidence<br>(GRADE) | Comments                                                                                                                                        |
|--------------------------------|-------------------------------------------|------------------------------------------|----------------------------------|---------------------------------|-----------------------------------------|-------------------------------------------------------------------------------------------------------------------------------------------------|
|                                | Risk with<br>Usual care                   | Risk with<br>Pulmonary<br>Rehabilitation |                                  |                                 |                                         |                                                                                                                                                 |
| Exercise capacity (ESWT)       | 217 per 1,000                             | <b>332 per 1,000</b><br>(174 to 631)     | <b>RR 1.53</b><br>(0.80 to 2.91) | 221<br>(2 RCTs)                 | ⊕○○○<br>Very low <sup>c</sup>           | The evidence is very uncertain about the effect of Pulmonary Rehabilitation on the number of people achieving MCID in exercise capacity (ESWT). |
| QoL - CRQ (Dyspnoea)           | 289 per 1,000                             | <b>422 per 1,000</b><br>(347 to 515)     | <b>RR 1.46</b><br>(1.20 to 1.78) | 670<br>(4 RCTs)                 | ⊕⊕⊕○<br>Moderate <sup>d</sup>           | Pulmonary Rehabilitation likely results in an increase in the number of people achieving MCID in CRQ (Dyspnoea).                                |
| QoL - CRQ (Fatigue)            | 271 per 1,000                             | <b>436 per 1,000</b><br>(342 to 564)     | <b>RR 1.61</b><br>(1.26 to 2.08) | 665<br>(4 RCTs)                 | ⊕⊕⊕○<br>Moderate <sup>e</sup>           | Pulmonary Rehabilitation likely results in an increase in the number of people achieving MCID in CRQ (Fatigue).                                 |
| QoL - CRQ (Emotional function) | 226 per 1,000                             | <b>328 per 1,000</b><br>(239 to 447)     | <b>RR 1.45</b><br>(1.06 to 1.98) | 670<br>(4 RCTs)                 | ⊕⊕⊕○<br>Moderate <sup>f</sup>           | Pulmonary Rehabilitation likely results in an increase in the number of people achieving a MCID in CRQ (Emotional function).                    |
| QoL - CRQ (Mastery)            | 337 per 1,000                             | <b>412 per 1,000</b><br>(317 to 530)     | <b>RR 1.22</b><br>(0.94 to 1.57) | 670<br>(4 RCTs)                 | ⊕○○○<br>Very low <sup>g</sup>           | The evidence is very uncertain about the effect of pulmonary Rehabilitation on the number of people achieving a MCID in CRQ (Mastery).          |

\*The risk in the intervention group (and its 95% confidence interval) is based on the assumed risk in the comparison group and the **relative effect** of the intervention (and its 95% CI).

CI: confidence interval; RR: risk ratio

### GRADE Working Group grades of evidence

**High certainty:** we are very confident that the true effect lies close to that of the estimate of the effect.

**Moderate certainty:** we are moderately confident in the effect estimate: the true effect is likely to be close to the estimate of the effect, but there is a possibility that it is substantially different.

**Low certainty:** our confidence in the effect estimate is limited: the true effect may be substantially different from the estimate of the effect.

**Very low certainty:** we have very little confidence in the effect estimate: the true effect is likely to be substantially different from the estimate of effect.

## Table S9: Summary of findings: Pulmonary Rehabilitation compared to usual care for ILD

### Pulmonary Rehabilitation compared to Usual care for ILD

Patient or population: ILD

Setting:

Intervention: Pulmonary Rehabilitation

Comparison: Usual care

| Outcomes | Anticipated absolute effects*<br>(95% CI) |                                          | Relative effect<br>(95% CI) | No of participants<br>(studies) | Certainty of the<br>evidence<br>(GRADE) | Comments |
|----------|-------------------------------------------|------------------------------------------|-----------------------------|---------------------------------|-----------------------------------------|----------|
|          | Risk with<br>Usual care                   | Risk with<br>Pulmonary<br>Rehabilitation |                             |                                 |                                         |          |



## Pulmonary Rehabilitation compared to Usual care for ILD

**Patient or population:** ILD

**Setting:**

**Intervention:** Pulmonary Rehabilitation

**Comparison:** Usual care

| Outcomes                       | Anticipated absolute effects* (95% CI) |                                    | Relative effect (95% CI)      | No of participants (studies) | Certainty of the evidence (GRADE) | Comments                                                                                                                     |
|--------------------------------|----------------------------------------|------------------------------------|-------------------------------|------------------------------|-----------------------------------|------------------------------------------------------------------------------------------------------------------------------|
|                                | Risk with Usual care                   | Risk with Pulmonary Rehabilitation |                               |                              |                                   |                                                                                                                              |
| Exercise capacity (6MWT)       | 152 per 1,000                          | <b>341 per 1,000</b> (196 to 593)  | <b>RR 2.24</b> (1.29 to 3.90) | 192 (2 RCTs)                 | ⊕⊕⊕○ Moderate <sup>a</sup>        | Pulmonary Rehabilitation likely results in an increase in the number of people achieving a MCID in exercise capacity (6MWT). |
| QoL - CRQ (Dyspnoea)           | 297 per 1,000                          | <b>478 per 1,000</b> (258 to 879)  | <b>RR 1.61</b> (0.87 to 2.96) | 133 (1 RCT)                  | ⊕⊕○○ Low <sup>b</sup>             | Pulmonary Rehabilitation may result in an increase in the number of people achieving a MCID in CRQ (Dyspnoea).               |
| QoL - CRQ (Fatigue)            | 234 per 1,000                          | <b>593 per 1,000</b> (342 to 966)  | <b>RR 2.53</b> (1.46 to 4.12) | 128 (1 RCT)                  | ⊕⊕⊕○ Moderate <sup>c</sup>        | Pulmonary Rehabilitation likely results in an increase in the number of people achieving a MCID in CRQ (Fatigue).            |
| QoL - CRQ (Emotional function) | 375 per 1,000                          | <b>419 per 1,000</b> (322 to 521)  | <b>OR 1.20</b> (0.79 to 1.81) | 133 (1 RCT)                  | ⊕⊕○○ Low <sup>d</sup>             | Pulmonary Rehabilitation may result in an increase in the number of people achieving MCID in CRQ (Emotional function).       |
| QoL - CRQ (Mastery)            | 333 per 1,000                          | <b>567 per 1,000</b> (377 to 847)  | <b>RR 1.70</b> (1.13 to 2.54) | 132 (1 RCT)                  | ⊕⊕⊕○ Moderate <sup>e</sup>        | Pulmonary Rehabilitation likely results in an increase in the number of people achieving a MCID in CRQ (Mastery).            |

\*The risk in the intervention group (and its 95% confidence interval) is based on the assumed risk in the comparison group and the **relative effect** of the intervention (and its 95% CI).

CI: confidence interval; OR: odds ratio; RR: risk ratio

### GRADE Working Group grades of evidence

**High certainty:** we are very confident that the true effect lies close to that of the estimate of the effect.

**Moderate certainty:** we are moderately confident in the effect estimate: the true effect is likely to be close to the estimate of the effect, but there is a possibility that it is substantially different.

**Low certainty:** our confidence in the effect estimate is limited: the true effect may be substantially different from the estimate of the effect.

**Very low certainty:** we have very little confidence in the effect estimate: the true effect is likely to be substantially different from the estimate of effect.

**Table S10: Summary of findings: Pulmonary Rehabilitation compared to Usual care for Bronchiectasis**

## Pulmonary Rehabilitation compared to Usual care for Bronchiectasis

**Patient or population:** Bronchiectasis

**Setting:**

**Intervention:** Pulmonary Rehabilitation

**Comparison:** Usual care

| Outcomes | Anticipated absolute effects* (95% CI) |                                    | Relative effect (95% CI) | No of participants (studies) | Certainty of the evidence (GRADE) | Comments |
|----------|----------------------------------------|------------------------------------|--------------------------|------------------------------|-----------------------------------|----------|
|          | Risk with Usual care                   | Risk with Pulmonary Rehabilitation |                          |                              |                                   |          |

## Pulmonary Rehabilitation compared to Usual care for Bronchiectasis

**Patient or population:** Bronchiectasis

**Setting:**

**Intervention:** Pulmonary Rehabilitation

**Comparison:** Usual care

| Outcomes                 | Anticipated absolute effects* (95% CI) |                                        | Relative effect (95% CI)         | № of participants (studies) | Certainty of the evidence (GRADE) | Comments                                                                                                                        |
|--------------------------|----------------------------------------|----------------------------------------|----------------------------------|-----------------------------|-----------------------------------|---------------------------------------------------------------------------------------------------------------------------------|
|                          | Risk with Usual care                   | Risk with Pulmonary Rehabilitation     |                                  |                             |                                   |                                                                                                                                 |
| Exercise capacity (6MWT) | 467 per 1,000                          | <b>751 per 1,000</b><br>(406 to 1,000) | <b>RR 1.61</b><br>(0.87 to 2.96) | 31<br>(1 RCT)               | ⊕○○○<br>Very low <sup>a</sup>     | The evidence is very uncertain about the effect of pulmonary Rehabilitation on achievement of MCID in exercise capacity (6MWT). |

\*The risk in the intervention group (and its 95% confidence interval) is based on the assumed risk in the comparison group and the **relative effect** of the intervention (and its 95% CI).

CI: confidence interval; RR: risk ratio

### GRADE Working Group grades of evidence

**High certainty:** we are very confident that the true effect lies close to that of the estimate of the effect.

**Moderate certainty:** we are moderately confident in the effect estimate: the true effect is likely to be close to the estimate of the effect, but there is a possibility that it is substantially different.

**Low certainty:** our confidence in the effect estimate is limited: the true effect may be substantially different from the estimate of the effect.

**Very low certainty:** we have very little confidence in the effect estimate: the true effect is likely to be substantially different from the estimate of effect.

**Table S11: Summary of findings: Home-based pulmonary rehabilitation compared to centre-based pulmonary rehabilitation for chronic respiratory disease**

## Home-based pulmonary rehabilitation compared to Centre-based pulmonary rehabilitation for Chronic Respiratory Disease

**Patient or population:** Chronic Respiratory Disease

**Setting:**

**Intervention:** Home-based pulmonary rehabilitation

**Comparison:** Centre-based pulmonary rehabilitation

| Outcomes                 | Anticipated absolute effects* (95% CI)          |                                               | Relative effect (95% CI)         | № of participants (studies) | Certainty of the evidence (GRADE) | Comments                                                                                                                                                                        |
|--------------------------|-------------------------------------------------|-----------------------------------------------|----------------------------------|-----------------------------|-----------------------------------|---------------------------------------------------------------------------------------------------------------------------------------------------------------------------------|
|                          | Risk with Centre-based pulmonary rehabilitation | Risk with Home-based pulmonary rehabilitation |                                  |                             |                                   |                                                                                                                                                                                 |
| Exercise capacity (6MWT) | 429 per 1,000                                   | <b>399 per 1,000</b><br>(304 to 480)          | <b>RR 0.93</b><br>(0.71 to 1.12) | 410<br>(4 RCTs)             | ⊕⊕○○<br>Low <sup>a</sup>          | Home-based pulmonary rehabilitation may result in little to no difference in achievement of MCID in exercise capacity (6MWT) compared to centre-based pulmonary rehabilitation. |
| QoL - CRQ (Dyspnoea)     | 606 per 1,000                                   | <b>599 per 1,000</b><br>(509 to 702)          | <b>RR 0.99</b><br>(0.84 to 1.16) | 437<br>(3 RCTs)             | ⊕⊕⊕○<br>Moderate <sup>b</sup>     | Home-based pulmonary rehabilitation likely results in little to no difference in achievement of MCID in CRQ (Dyspnoea) compared to centre-based pulmonary rehabilitation.       |

## Home-based pulmonary rehabilitation compared to Centre-based pulmonary rehabilitation for Chronic Respiratory Disease

**Patient or population:** Chronic Respiratory Disease

**Setting:**

**Intervention:** Home-based pulmonary rehabilitation

**Comparison:** Centre-based pulmonary rehabilitation

| Outcomes                       | Anticipated absolute effects* (95% CI)          |                                               | Relative effect (95% CI)         | No of participants (studies) | Certainty of the evidence (GRADE) | Comments                                                                                                                                                                          |
|--------------------------------|-------------------------------------------------|-----------------------------------------------|----------------------------------|------------------------------|-----------------------------------|-----------------------------------------------------------------------------------------------------------------------------------------------------------------------------------|
|                                | Risk with Centre-based pulmonary rehabilitation | Risk with Home-based pulmonary rehabilitation |                                  |                              |                                   |                                                                                                                                                                                   |
| QoL - CRQ (Fatigue)            | 549 per 1,000                                   | <b>521 per 1,000</b><br>(422 to 647)          | <b>RR 0.95</b><br>(0.77 to 1.18) | 284<br>(2 RCTs)              | ⊕⊕○○<br>Low <sup>c</sup>          | Home-based pulmonary rehabilitation may result in little to no difference compared to centre-based pulmonary rehabilitation in achievement of MCID in CRQ (Fatigue).              |
| QoL - CRQ (Emotional function) | 414 per 1,000                                   | <b>426 per 1,000</b><br>(323 to 559)          | <b>RR 1.03</b><br>(0.78 to 1.35) | 286<br>(2 RCTs)              | ⊕⊕○○<br>Low <sup>d</sup>          | Home-based pulmonary rehabilitation may result in little to no difference compared to centre-based pulmonary rehabilitation in achievement of MCID in CRQ (Emotional function).   |
| QoL - CRQ (Mastery)            | 528 per 1,000                                   | <b>459 per 1,000</b><br>(301 to 691)          | <b>RR 0.87</b><br>(0.57 to 1.31) | 283<br>(2 RCTs)              | ⊕○○○<br>Very low <sup>e</sup>     | The evidence is very uncertain about the effect of home-based pulmonary rehabilitation compared to centre-based pulmonary rehabilitation on achievement of MCID in CRQ (Mastery). |

\*The risk in the intervention group (and its 95% confidence interval) is based on the assumed risk in the comparison group and the **relative effect** of the intervention (and its 95% CI).

CI: confidence interval; RR: risk ratio

### GRADE Working Group grades of evidence

**High certainty:** we are very confident that the true effect lies close to that of the estimate of the effect.

**Moderate certainty:** we are moderately confident in the effect estimate: the true effect is likely to be close to the estimate of the effect, but there is a possibility that it is substantially different.

**Low certainty:** our confidence in the effect estimate is limited: the true effect may be substantially different from the estimate of the effect.

**Very low certainty:** we have very little confidence in the effect estimate: the true effect is likely to be substantially different from the estimate of effect.

**Figure S1.** Meta-analysis of the number of participants achieving MCID in ISWT (pulmonary rehabilitation versus usual care).

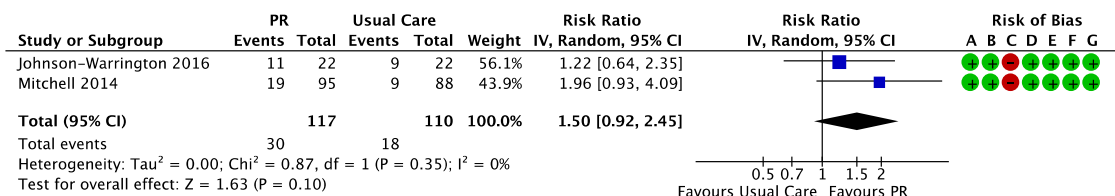

#### Risk of bias legend

- (A) Random sequence generation (selection bias)
- (B) Allocation concealment (selection bias)
- (C) Blinding of participants and personnel (performance bias)
- (D) Blinding of outcome assessment (detection bias)
- (E) Incomplete outcome data (attrition bias)
- (F) Selective reporting (reporting bias)
- (G) Other bias

**Figure S2.** Meta-analysis of the number of participants achieving MCID in ESWT (pulmonary rehabilitation versus usual care).

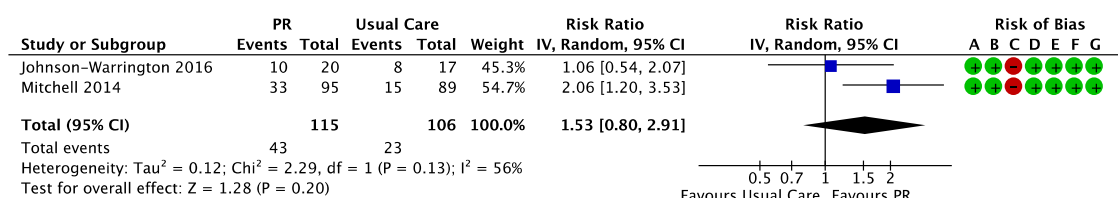

Risk of bias legend

- (A) Random sequence generation (selection bias)
- (B) Allocation concealment (selection bias)
- (C) Blinding of participants and personnel (performance bias)
- (D) Blinding of outcome assessment (detection bias)
- (E) Incomplete outcome data (attrition bias)
- (F) Selective reporting (reporting bias)
- (G) Other bias

**Figure S3.** Meta-analysis of the number of participants achieving MCID in mMRC dyspnoea score (home-based pulmonary rehabilitation versus centre-based pulmonary rehabilitation)

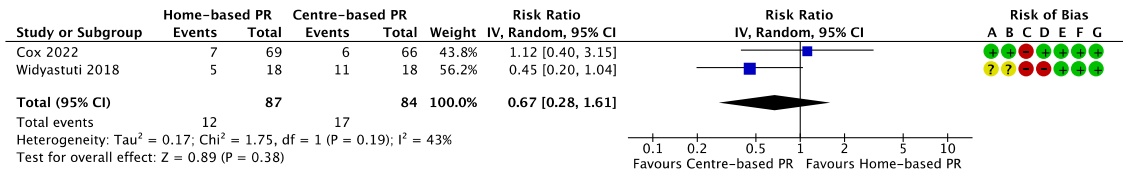

**Risk of bias legend**

- (A) Random sequence generation (selection bias)
- (B) Allocation concealment (selection bias)
- (C) Blinding of participants and personnel (performance bias)
- (D) Blinding of outcome assessment (detection bias)
- (E) Incomplete outcome data (attrition bias)
- (F) Selective reporting (reporting bias)
- (G) Other bias

**Figure S4.** Meta-analysis of the number of participants achieving MCID in CAT score (home-based pulmonary rehabilitation versus centre-based pulmonary rehabilitation).

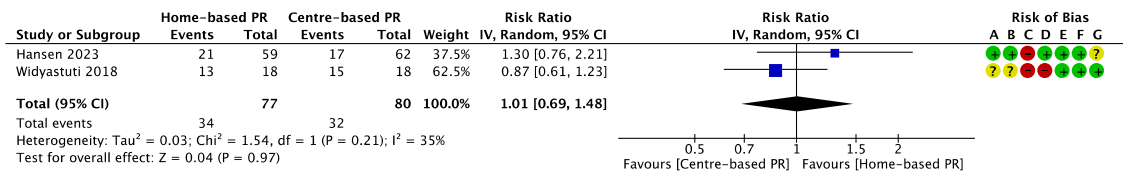

**Risk of bias legend**

- (A) Random sequence generation (selection bias)
- (B) Allocation concealment (selection bias)
- (C) Blinding of participants and personnel (performance bias)
- (D) Blinding of outcome assessment (detection bias)
- (E) Incomplete outcome data (attrition bias)
- (F) Selective reporting (reporting bias)
- (G) Other bias

## References for included studies (all included reports)

- Baumann HJ, Kluge S, Rummel K, Klose H, Hennigs JK, Schmoller T, Meyer A. Low intensity, long-term outpatient rehabilitation in COPD: a randomised controlled trial. *Respir Res.* 2012;13(1):86. doi: 10.1186/1465-9921-13-86.
- Benzo R, Vickers K, Novotny PJ, Tucker S, Hoult J, Neuenfeldt P, Connett J, Lorig K, McEvoy C. Health Coaching and Chronic Obstructive Pulmonary Disease Rehospitalization. A Randomized Study. *Am J Respir Crit Care Med.* 2016;194(6):672-80. doi: 10.1164/rccm.201512-2503OC.
- Benzo RP, Ridgeway J, Hoult JP, Novotny P, Thomas BE, Lam NM, V Benzo M, Kramer K, Seifert S. Feasibility of a Health Coaching and Home-Based Rehabilitation Intervention With Remote Monitoring for COPD. *Respir Care.* 2021;66(6):960-971. doi: 10.4187/respcare.08580.
- Benzo R, Hoult J, McEvoy C, Clark M, Benzo M, Johnson M, Novotny P. Promoting Chronic Obstructive Pulmonary Disease Wellness through Remote Monitoring and Health Coaching: A Clinical Trial. *Ann Am Thorac Soc.* 2022;19(11):1808-1817. doi: 10.1513/AnnalsATS.202203-214OC.
- Benzo R, Novotny P, McEvoy C. Health Coaching Improves Self Management In COPD After A Hospitalization. *Am J Respir Crit Care Med* 2017;195:A6738.
- Bernocchi P, Vitacca M, La Rovere MT, Volterrani M, Galli T, Baratti D, Paneroni M, Campolongo G, Sposato B, Scalvini S. Home-based telerehabilitation in older patients with chronic obstructive pulmonary disease and heart failure: a randomised controlled trial. *Age Ageing.* 2018;47(1):82-88. doi: 10.1093/ageing/afx146
- Bourne S, DeVos R, North M, Chauhan A, Green B, Brown T, Cornelius V, Wilkinson T. Online versus face-to-face pulmonary rehabilitation for patients with chronic obstructive pulmonary disease: randomised controlled trial. *BMJ Open.* 2017;7(7):e014580. doi: 10.1136/bmjopen-2016-014580.
- Casaburi R, Bhasin S, Cosentino L, Porszasz J, Somfay A, Lewis MI, Fournier M, Storer TW. Effects of testosterone and resistance training in men with chronic obstructive pulmonary disease. *Am J Respir Crit Care Med.* 2004;170(8):870-8. doi: 10.1164/rccm.200305-617OC.
- Casey D, Murphy K, Devane D, Cooney A, McCarthy B, Mee L, Newell J, O'Shea E, Scarrott C, Gillespie P, Kirwan C, Murphy AW. The effectiveness of a structured education pulmonary rehabilitation programme for improving the health status of people with moderate and severe chronic obstructive pulmonary disease in primary care: the PRINCE cluster randomised trial. *Thorax.* 2013 Oct;68(10):922-8. doi: 10.1136/thoraxjnl-2012-203103.
- Cedeño de Jesús S, Almadana Pacheco V, Valido Morales A, Muñiz Rodríguez AM, Ayerbe García R, Arnedillo-Muñoz A. Exercise Capacity and Physical Activity in Non-Cystic Fibrosis Bronchiectasis after a Pulmonary Rehabilitation Home-Based Programme: A Randomised Controlled Trial. *Int J Environ Res Public Health.* 2022;19(17):11039. doi: 10.3390/ijerph191711039.
- Cerdán-de-Las-Heras J, Balbino F, Løkke A, Catalán-Matamoros D, Hilberg O, Bendstrup E. Tele-Rehabilitation Program in Idiopathic Pulmonary Fibrosis-A Single-Center Randomized Trial. *Int J Environ Res Public Health.* 2021 Sep 23;18(19):10016. doi: 10.3390/ijerph181910016.
- Cerdán-de-Las-Heras J, Balbino F, Løkke A, Catalán-Matamoros D, Hilberg O, Bendstrup E. Effect of a New Tele-Rehabilitation Program versus Standard Rehabilitation in Patients with

Chronic Obstructive Pulmonary Disease. *J Clin Med.* 2021;11(1):11. doi: 10.3390/jcm11010011.

Chen Y, Niu M, Zhang X, Qian H, Xie A, Wang X. Effects of home-based lower limb resistance training on muscle strength and functional status in stable Chronic obstructive pulmonary disease patients. *J Clin Nurs.* 2018;27(5-6):e1022-e1037. doi: 10.1111/jocn.14131.

Cox NS, McDonald CF, Mahal A, Alison JA, Wootton R, Hill CJ, Zanaboni P, O'Halloran P, Bondarenko J, Macdonald H, Barker K, Crute H, Mellerick C, Wageck B, Boursinos H, Lahham A, Nichols A, Czupryn P, Corbett M, Handley E, Burge AT, Holland AE. Telerehabilitation for chronic respiratory disease: a randomised controlled equivalence trial. *Thorax.* 2022 Jul;77(7):643-651. doi: 10.1136/thoraxjnl-2021-216934.

Dale MT, McKeough ZJ, Munoz PA, Corte P, Bye PT, Alison JA. Exercise training for asbestos-related and other dust-related respiratory diseases: a randomised controlled trial. *BMC Pulm Med.* 2014;14:180. doi: 10.1186/1471-2466-14-180.

Deepak TH, Mohapatra PR, Janmeja AK, Sood P, Gupta M. Outcome of pulmonary rehabilitation in patients after acute exacerbation of chronic obstructive pulmonary disease. *Indian J Chest Dis Allied Sci.* 2014;56(1):7-12.

Dowman LM, McDonald CF, Hill CJ, Lee AL, Barker K, Boote C, Glaspole I, Goh NSL, Southcott AM, Burge AT, Gillies R, Martin A, Holland AE. The evidence of benefits of exercise training in interstitial lung disease: a randomised controlled trial. *Thorax.* 2017;72(7):610-619. doi: 10.1136/thoraxjnl-2016-208638.

Dowman L, McDonald C, Hill C, Lee A, Burge A, Holland A. Achieving the minimal important difference following exercise in ILD. *Respirology* 2018;23.

Eaton T, Young P, Fergusson W, Moodie L, Zeng I, O'Kane F, Good N, Rhodes L, Poole P, Kolbe J. Does early pulmonary rehabilitation reduce acute health-care utilization in COPD patients admitted with an exacerbation? A randomized controlled study. *Respirology.* 2009;14(2):230-8. doi: 10.1111/j.1440-1843.2008.01418.x.

Ercin DOZ, Alkan H, Findikoglu G, Dursunoglu N, Evyapan F, Ardic F. Interval Versus Continuous Aerobic Exercise Training in Overweight and Obese Patients With Chronic Obstructive Pulmonary Disease: A RANDOMIZED CONTROLLED STUDY. *J Cardiopulm Rehabil Prev.* 2020;40(4):268-275. doi: 10.1097/HCR.0000000000000519.

Faulkner J, Walshaw E, Campbell J, Jones R, Taylor R, Price D, Taylor AH. The feasibility of recruiting patients with early COPD to a pilot trial assessing the effects of a physical activity intervention. *Prim Care Respir J.* 2010 Jun;19(2):124-30. doi: 10.4104/pcrj.2010.00008.

Gottlieb V, Lyngsø AM, Nybo B, Frølich A, Backer V. Pulmonary rehabilitation for moderate COPD (GOLD 2)--does it have an effect? *COPD.* 2011;8(5):380-6. doi: 10.3109/15412555.2011.610393.

Hansen H, Bieler T, Beyer N, Kallemose T, Wilcke JT, Østergaard LM, Frost Andeassen H, Martinez G, Lavesen M, Frølich A, Godtfredsen NS. Supervised pulmonary tele-rehabilitation versus pulmonary rehabilitation in severe COPD: a randomised multicentre trial. *Thorax.* 2020;75(5):413-421. doi: 10.1136/thoraxjnl-2019-214246.

Hoff J, Tjønnå AE, Steinshamn S, Høydal M, Richardson RS, Helgerud J. Maximal strength training of the legs in COPD: a therapy for mechanical inefficiency. *Med Sci Sports Exerc.* 2007 Feb;39(2):220-6. doi: 10.1249/01.mss.0000246989.48729.39.

Hansen H, Torre A, Kallemose T, Ulrik CS, Godtfredsen NS. Pulmonary telerehabilitation vs. conventional pulmonary rehabilitation - a secondary responder analysis. *Thorax*. 2023;thorax-2023-220065.

Holland AE, Hill CJ, Conron M, Munro P, McDonald CF. Short term improvement in exercise capacity and symptoms following exercise training in interstitial lung disease. *Thorax*. 2008 Jun;63(6):549-54. doi: 10.1136/thx.2007.088070.

Holland AE, Mahal A, Hill CJ, Lee AL, Burge AT, Cox NS, Moore R, Nicolson C, O'Halloran P, Lahham A, Gillies R, McDonald CF. Home-based rehabilitation for COPD using minimal resources: a randomised, controlled equivalence trial. *Thorax*. 2017 Jan;72(1):57-65. doi: 10.1136/thoraxjnl-2016-208514.

Horton EJ, Mitchell KE, Johnson-Warrington V, Apps LD, Sewell L, Morgan M, Taylor RS, Singh SJ. Comparison of a structured home-based rehabilitation programme with conventional supervised pulmonary rehabilitation: a randomised non-inferiority trial. *Thorax*. 2018 Jan;73(1):29-36. doi: 10.1136/thoraxjnl-2016-208506.

Johnson-Warrington V, Rees K, Gelder C, Morgan MD, Singh SJ. Can a supported self-management program for COPD upon hospital discharge reduce readmissions? A randomized controlled trial. *Int J Chron Obstruct Pulmon Dis*. 2016;11:1161-9. doi: 10.2147/COPD.S91253.

José A, Holland AE, Selman JPR, de Camargo CO, Fonseca DS, Athanazio RA, Rached SZ, Cukier A, Stelmach R, Dal Corso S. Home-based pulmonary rehabilitation in people with bronchiectasis: a randomised controlled trial. *ERJ Open Res*. 2021;7(2):00021-2021. doi: 10.1183/23120541.00021-2021.

Ku V, Janmeja AK, Aggarwal D, Sood P. Pulmonary rehabilitation in patients with interstitial lung diseases in an outpatient setting: a randomised controlled trial. *Indian Journal of Chest Diseases and Allied Sciences* 2017;59:75-80.

Lahham A, McDonald C, Mahal A, Hill C, Lee A, Moore R, Nicolson C, Cox N, Burge A, Gillies R, Holland A. Identifying Responders to Home and Hospitalbased Pulmonary Rehabilitation in People with COPD: analysis from the Homebase Trial. *Respirology* 2020;25:40.

Lahham A, McDonald CF, Moore R, Cox NS, Rawlings S, Nichols A, Liacos A, Holland AE. The impact of home-based pulmonary rehabilitation on people with mild chronic obstructive pulmonary disease: A randomised controlled trial. *Clin Respir J*. 2020;14(4):335-344. doi: 10.1111/crj.13138.

Lee SW, Park JJ, Lyu YR, Lee EJ, Kim SY, Kang W, Son JW, Jung IC, Park YC. The effect of lung-conduction exercise in chronic obstructive pulmonary disease: Randomized, assessor-blind, multicenter pilot trial. *Medicine (Baltimore)*. 2022;101(3):e28629. doi: 10.1097/MD.00000000000028629.

Majewska-Pulsakowska M, Wytrychowski K, Rożek-Piechura K. The Role of Inspiratory Muscle Training in the Process of Rehabilitation of Patients with Chronic Obstructive Pulmonary Disease. *Adv Exp Med Biol*. 2016;885:47-51. doi: 10.1007/5584\_2015\_194.

Maltais F, Bourbeau J, Shapiro S, Lacasse Y, Perrault H, Baltzan M, Hernandez P, Rouleau M, Julien M, Parenteau S, Paradis B, Levy RD, Camp P, Lecours R, Audet R, Hutton B, Penrod JR, Picard D, Bernard S; Chronic Obstructive Pulmonary Disease Axis of Respiratory Health Network, Fonds de recherche en santé du Québec. Effects of home-based pulmonary



rehabilitation in patients with chronic obstructive pulmonary disease: a randomized trial. *Ann Intern Med.* 2008;149(12):869-78. doi: 10.7326/0003-4819-149-12-200812160-00006.

Man WD, Polkey MI, Donaldson N, Gray BJ, Moxham J. Community pulmonary rehabilitation after hospitalisation for acute exacerbations of chronic obstructive pulmonary disease: randomised controlled study. *BMJ.* 2004;329(7476):1209. doi: 10.1136/bmj.38258.662720.3A.

Mitchell KE, Johnson-Warrington V, Apps LD, Bankart J, Sewell L, Williams JE, Rees K, Jolly K, Steiner M, Morgan M, Singh SJ. A self-management programme for COPD: a randomised controlled trial. *Eur Respir J.* 2014 Dec;44(6):1538-47. doi: 10.1183/09031936.00047814.

Naz I, Ozalevli S, Ozkan S, Sahin H. Efficacy of a Structured Exercise Program for Improving Functional Capacity and Quality of Life in Patients With Stage 3 and 4 Sarcoidosis: A RANDOMIZED CONTROLLED TRIAL. *J Cardiopulm Rehabil Prev.* 2018 Mar;38(2):124-130. doi: 10.1097/HCR.0000000000000307.

Nyberg A, Lindström B, Rickenlund A, Wadell K. Low-load/high-repetition elastic band resistance training in patients with COPD: a randomized, controlled, multicenter trial. *Clin Respir J.* 2015;9(3):278-88. doi: 10.1111/crj.12141.

O'Shea SD, Taylor NF, Paratz JD. A predominantly home-based progressive resistance exercise program increases knee extensor strength in the short-term in people with chronic obstructive pulmonary disease: a randomised controlled trial. *Aust J Physiother.* 2007;53(4):229-37. doi: 10.1016/s0004-9514(07)70003-x

Perez-Bogerd S, Wuyts W, Barbier V, Demeyer H, Van Muylem A, Janssens W, Troosters T. Short and long-term effects of pulmonary rehabilitation in interstitial lung diseases: a randomised controlled trial. *Respir Res.* 2018;19(1):182. doi: 10.1186/s12931-018-0884-y.

Tsai LL, McNamara RJ, Moddel C, Alison JA, McKenzie DK, McKeough ZJ. Home-based telerehabilitation via real-time videoconferencing improves endurance exercise capacity in patients with COPD: The randomized controlled TeleR Study. *Respirology.* 2017;22(4):699-707. doi: 10.1111/resp.12966.

Vainshelboim B, Oliveira J, Yehoshua L, Weiss I, Fox BD, Fruchter O, Kramer MR. Exercise training-based pulmonary rehabilitation program is clinically beneficial for idiopathic pulmonary fibrosis. *Respiration.* 2014;88(5):378-88. doi: 10.1159/000367899.

Vasilopoulou M, Papaioannou AI, Kaltsakas G, Louvaris Z, Chynkiamis N, Spetsioti S, Kortianou E, Genimata SA, Palamidis A, Kostikas K, Koulouris NG, Vogiatzis I. Home-based maintenance tele-rehabilitation reduces the risk for acute exacerbations of COPD, hospitalisations and emergency department visits. *Eur Respir J.* 2017;49(5):1602129. doi: 10.1183/13993003.02129-2016.

Wallaert B, Kyheng M, Labreuche J, Stelianides S, Wemeau L, Grosbois JM. Long-term effects of pulmonary rehabilitation on daily life physical activity of patients with stage IV sarcoidosis: A randomized controlled trial. *Respir Med Res.* 2020;77:1-7. doi: 10.1016/j.resmer.2019.10.003.

Widyastuti K, Makhahah DN, Setijadi AR, Sutanto YS, Suradi, Ambrosino N. Benefits and costs of home pedometer assisted physical activity in patients with COPD. A preliminary randomized controlled trial. *Pulmonology.* 2018;24(4):211-218. doi: 10.1016/j.pulmoe.2018.01.006.

Wootton SL, Ng LW, McKeough ZJ, Jenkins S, Hill K, Eastwood PR, Hillman DR, Cecins N, Spencer LM, Jenkins C, Alison JA. Ground-based walking training improves quality of life and exercise capacity in COPD. *Eur Respir J*. 2014;44(4):885-94. doi: 10.1183/09031936.00078014.
